# Supplementary material
Source: Springer Nature journal article supplement (http://www.springermedizin.de/resource/supplementary/12888_2010_703_MOESM4_ESM.pdf/9478218)

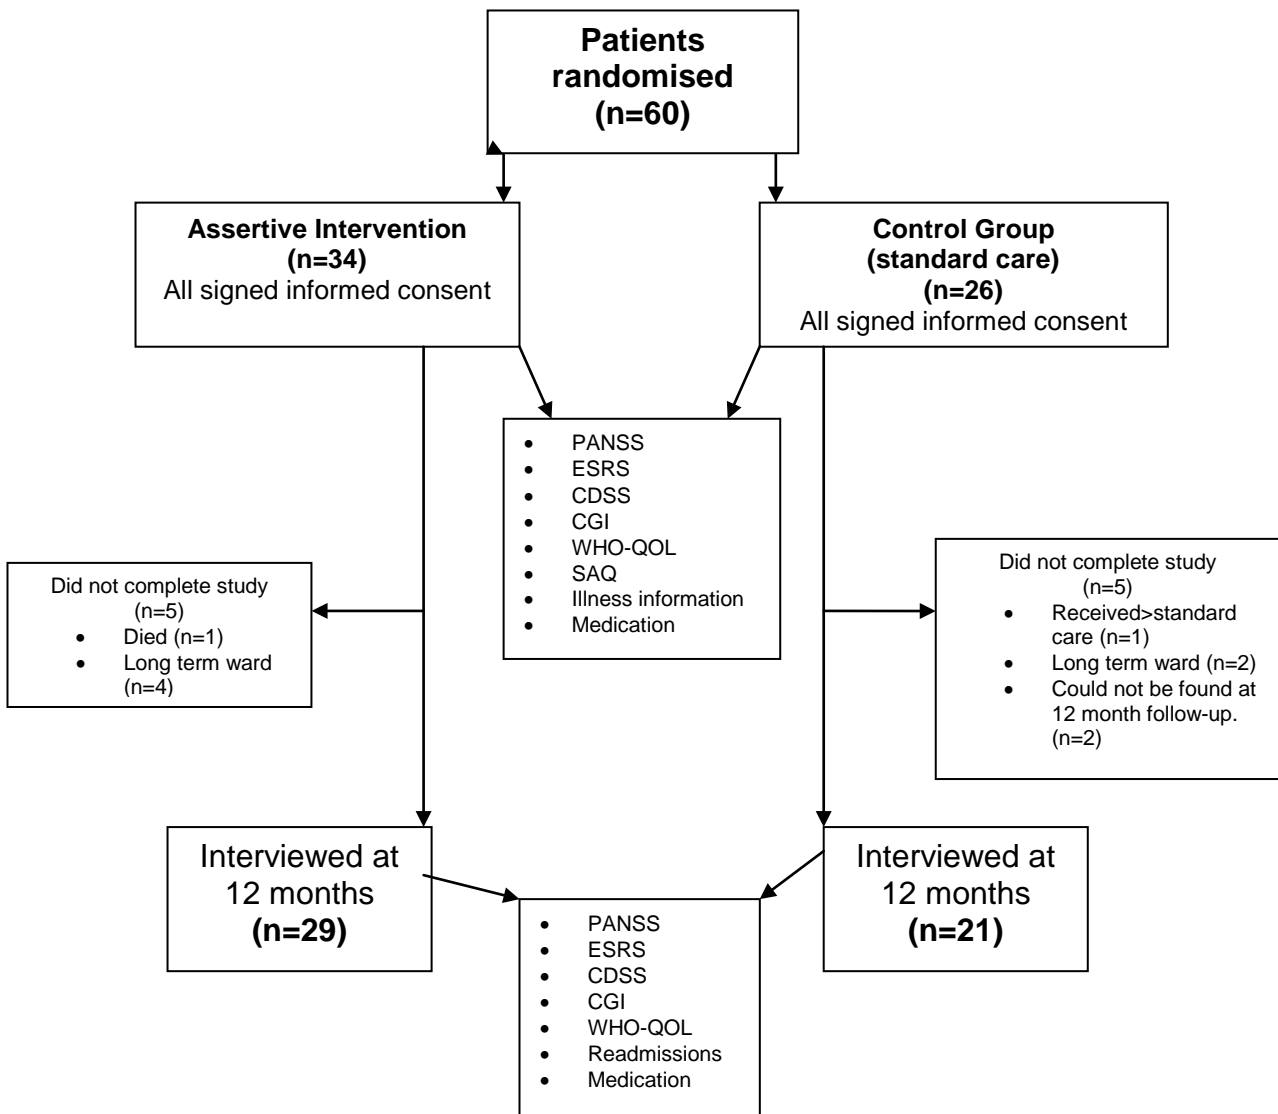

Supplement: MOESM4 [file 9478218]
